# Supplementary material for: Monocyte-to-albumin ratio as a novel predictor of long-term adverse outcomes in patients after percutaneous coronary intervention
Source: PubMed Central journal article supplement (PMC8243340; doi:10.1042/bsr20210154), 2021-06-29
Supplement: BSR-2021-0154_supp.pdf [file BSR-2021-0154_supp.pdf]

**Supplementary table 1** Laboratory measurements for biomarkers

| Variables                     | laboratory measurements |
|-------------------------------|-------------------------|
| Monocytes, 10 <sup>9</sup> /L | 0.1-0.6                 |
| Albumin, g/L                  | 35-50                   |
| Cr, umol/L                    | 20-115                  |
| UA, mmol/L                    | 140-360                 |
| TG, mmol/L                    | <1.7                    |
| TC, mmol/L                    | <5.2                    |
| LDL-C, mmol/L                 | <3.61                   |
| HDL-C, mmol/L                 | >0.91                   |
